# Supplementary material for: Efficacy and Safety of Multiple Dupilumab Dose Regimens After Initial Successful Treatment in Patients With Atopic Dermatitis: A Randomized Clinical Trial
Source: PubMed Central journal article supplement — JAMA Dermatol. 2019 Dec 26;156(2):131–43. doi: 10.1001/jamadermatol.2019.3617 (PMC6990756; doi:10.1001/jamadermatol.2019.3617), 2019-12-26
Supplement: jamadermatol-156-131-s003.pdf [file jamadermatol-156-131-s003.pdf]

## Data Sharing Statement

Worm. Efficacy and Safety of Multiple Dupilumab Dose Regimens After Initial Successful Treatment in Patients With Atopic Dermatitis. *JAMA Dermatol*. Published December 20, 2019.  
10.1001/jamadermatol.2019.3617

### Data

**Data available:** No

### Additional Information

**Explanation for why data not available:** Qualified researchers may request access to study documents (including the clinical study report, study protocol with any amendments, blank case report form, statistical analysis plan) that support the methods and findings reported in this manuscript. Individual anonymized participant data will be considered for sharing once the indication has been approved by a regulatory body, if there is legal authority to share the data and there is not a reasonable likelihood of participant re-identification. Submit requests to <https://errs.regeneron.com/external>.
